# Supplementary material
Source: publisher figshare collection journal article supplement (https://sage.figshare.com/ndownloader/files/22217211)
Supplement: Supplementary file 1 [file 22217211]

## Sheet: Feuil1
Table 1: sgRNA used in the study
name	forward	reverse	ref GeCKO
UNC93B1 #1	CACCTGTTGCCATACTTCACCTCG	AAACCGAGGTGAAGTATGGCAACA	LibB_52973
TLR3 #2	CACCTACCTTGTGAAGTTGGCGGC	AAACGCCGCCAACTTCACAAGGTA	LibB_49588
DLX1 #3	CACCGAAAAAAGATCCGTAAACCC	AAACGGGTTTACGGATCTTTTTTC	LibB_13352
HAVCR1 #4	CACCGCTCGTTCGAACAGTCGTGA	AAACTCACGACTGTTCGAACGAGC	LibA_20898
PRR9 #5	CACCCCTGCACTAGACACTTATCT	AAACAGATAAGTGTCTAGTGCAGG	LibA_38854
YY1 #6	CACCGATGTAGAGGGTGTCGCCCG	AAACCGGGCGACACCCTCTACATC	LibA_54756
DLL3 #7	CACCGAGATCAGGCGCGGGCGCTC	AAACGAGCGCCCGCGCCTGATCTC	LibA_13362
C9orf169 #8	CACCGGTTCTTGACGACCATCTCT	AAACAGAGATGGTCGTCAAGAACC	LibB_6700
HS3ST1 #9	CACCGATCGACTTGGGGGTGCGCC	AAACGGCGCACCCCCAAGTCGATC	LibA_22120
CINP #10	CACCGGCACAATTTAATCCTGAAG	AAACCTTCAGGATTAAATTGTGCC	LibA_9715
CHRNA2 #11	CACCGACGTGGTGATTGTGCGCTT	AAACAAGCGCACAATCACCACGTC	LibA_9568
FXYD6 #12	CACCCATCGCTCACCATAATGAAA	AAACTTTCATTATGGTGAGCGATG	LibB_18213
KLK8 #13	CACCGGGACGCCCCCGACCTCGTG	AAACCACGAGGTCGGGGGCGTCCC	LibB_25235
SCGB2A1 #14	CACCAGACAGTGATGCCGCTGCAG	AAACCTGCAGCGGCATCACTGTCT	LibA_42924
SOD1 #15	CACCTTGCATCATTGGCCGCACAC	AAACGTGTGCGGCCAATGATGCAA	LibA_46143
TMEM147 #16	CACCGGTCCGAGTACAACGCCTTC	AAACGAAGGCGTTGTACTCGGACC	LibA_49975
CD2BP2 #17	CACCGGTCCTGGGAGCCGCTTTAA	AAACTTAAAGCGGCTCCCAGGACC	LibA_8331
MAP2K2 #18	CACCTCTCTGCAGGGCAAACCTGG	AAACCCAGGTTTGCCCTGCAGAGA	LibA_28143
PDZD7 #19	CACCTGATCTTGTCCCCCACGCAC	AAACGTGCGTGGGGGACAAGATCA	LibB_35935
ZNF14 #20	CACCTTCATGCAATCGAATTTGAC	AAACGTCAAATTCGATTGCATGAA	LibA_55479
ZNF586 #21	CACCCCAGAAGAGATCACAAACAC	AAACGTGTTTGTGATCTCTTCTGG	LibA_56326
CELA1 #24	CACCACGTTATCGCTGTTCCAGTA	AAACTACTGGAACAGCGATAACGT	LibB_8982
CLIP2 #25	CACCGAGGCCAATCGTCACTCCCC	AAACGGGGAGTGACGATTGGCCTC	LibB_10035
CXXC11 #26	CACCTATGACATCGAAGACTGCGA	AAACTCGCAGTCTTCGATGTCATA	LibB_11957
CYB5D2 #27	CACCGAGCTGTCTCGCTACCGCGG	AAACCCGCGGTAGCGAGACAGCTC	LibA_11998
DLGAP3 #28	CACCGTGAGAGCCCTAGCCGCATC	AAACGATGCGGCTAGGGCTCTCAC	LibA_13345
DMRTB1 #29	CACCGTGTCCCGCAGCCAGTACCA	AAACTGGTACTGGCTGCGGGACAC	LibB_13413
HLA-DOB #30	CACCTGGGAATCGTCATCCAGCTA	AAACTAGCTGGATGACGATTCCCA	LibA_21612
LILRB4 #31	CACCCAGACTCACCTGCCTGCATG	AAACCATGCAGGCAGGTGAGTCTG	LibB_26480
PPP4R2 #32	CACCGGGAAGCCATGGACGTCGAG	AAACCTCGACGTCCATGGCTTCCC	LibA_38207
SGCE #33	CACCTGATGGGTATACATTCCGAT	AAACATCGGAATGTATACCCATCA	LibA_43805
SGCZ #34	CACCACTCAGATATACCTTCAAGT	AAACACTTGAAGGTATATCTGAGT	LibB_43759
SRGAP2D #35	CACCCCGTGGAGTCAGGGGAGCAT	AAACATGCTCCCCTGACTCCACGG	LibA_46979
PPFIBP2 #36	CACCGCCTCAAGTCCTCGATGAGA	AAACTCTCATCGAGGACTTGAGGC	LibA_37889
RAB11FIP4 #37	CACCTGTGCTGTCGGTGGAGAGCG	AAACCGCTCTCCACCGACAGCACA	LibB_39752
ANKS1A #38	CACCCTGCACCATGCTGCTTTGAA	AAACTTCAAAGCAGCATGGTGCAG	LibB_2147
PATL2 #39	CACCGCCAAGATGAATTGCCTTGA	AAACTCAAGGCAATTCATCTTGGC	LibA_35285
PPP2R4 #40	CACCGATTGATGAGACTCCTCCAG	AAACCTGGAGGAGTCTCATCAATC	LibB_38118
UNC93B1 #41*	CACCCTACGACGAGACCTACCGCG	AAACCGCGGTAGGTCTCGTCGTAG	LibA_53037
TLR3 #42	CACCTTCGGAGCATCAGTCGTTGA	AAACTCAACGACTGATGCTCCGAA	LibA_49648
DLX1 #43*	CACCCTCGTCCTTCTCCCGACCGC	AAACGCGGTCGGGAGAAGGACGAG	LibA_13372
PRR9 #45	CACCGCTATTCCAGACAAAATGTG	AAACCACATTTTGTCTGGAATAGC	LibB_38804
YY1 #46	CACCGTCGGGTCGTCGGTGACCAG	AAACCTGGTCACCGACGACCCGAC	LibA_54757
DLL3 #47	CACCGGGGGAGGAAAATGAGCGCT	AAACAGCGCTCATTTTCCTCCCCC	LibB_13343
C9orf169 #48	CACCCCTCGGTCGGCTGCAAGAGG	AAACCCTCTTGCAGCCGACCGAGG	LibB_6699
HS3ST1 #49	CACCCGCCATCGCGGACGTCATCC	AAACGGATGACGTCCGCGATGGCG	LibA_22121
FXYD6 #52	CACCGCAGTTTCAATCAGAAGCCC	AAACGGGCTTCTGATTGAAACTGC	LibB_18215
KLK8 #53	CACCATCCACGTCTTGGCCGCACG	AAACCGTGCGGCCAAGACGTGGAT	LibA_25269
SCGB2A1 #54	CACCACTCACCTGCATAGCAGTGC	AAACGCACTGCTATGCAGGTGAGT	LibB_42870
SOD1 #55*	CACCTAAATAGGCTGTACCAGTGC	AAACGCACTGGTACAGCCTATTTA	LibA_46144
TMEM147 #56	CACCCTTGTCATGTCCCGGAATGC	AAACGCATTCCGGGACATGACAAG	LibA_49976
CD2BP2 #57	CACCGATCACACCCTTTAACCTGC	AAACGCAGGTTAAAGGGTGTGATC	LibB_8324
MAP2K2 #58	CACCGATCTCCCCGTCACTGTAGA	AAACTCTACAGTGACGGGGAGATC	LibA_28142
PDZD7 #59	CACCGGGCATCTTCGTCAGCAAAG	AAACCTTTGCTGACGAAGATGCCC	LibB_35936
ZNF14 #60	CACCTTCAAAAACCTGGTTTGTCT	AAACAGACAAACCAGGTTTTTGAA	LibB_55412
ZNF586 #61	CACCCTGAGCAGGCGCCCTCAGAG	AAACCTCTGAGGGCGCCTGCTCAG	LibA_56327
AHR #62*	CACCAAGTCGGTCTCTATGCCGCT	AAACAGCGGCATAGAGACCGACTT	LibA_1306
C6orf163 #63	CACCTCGAAGCTGTGGAGAAAGCC	AAACGGCTTTCTCCACAGCTTCGA	LibB_6450
CELA1 #64	CACCCCTCAGTCCCTCCGACTACG	AAACCGTAGTCGGAGGGACTGAGG	LibA_8990
CLIP2 #65	CACCGTCATGGGTCTTCCGGGACA	AAACTGTCCCGGAAGACCCATGAC	LibA_10044
CXXC11 #66	CACCCGTCGTGACCCGCGGTGACC	AAACGGTCACCGCGGGTCACGACG	LibA_11968
CYB5D2 #67	CACCAGCATGTGATGGCTAGCGGT	AAACACCGCTAGCCATCACATGCT	LibB_11986
DLGAP3 #68	CACCCTCGCTGGTATGGTAGTGTG	AAACCACACTACCATACCAGCGAG	LibA_13344
DMRTB1 #69	CACCCCCCTACTGCCCGTTCCCGC	AAACGCGGGAACGGGCAGTAGGGG	LibB_13414
LILRB4 #71	CACCCCCAGGACCCACATGCAGGC	AAACGCCTGCATGTGGGTCCTGGG	LibB_26479
PPP4R2 #72	CACCGTGAATTGTTAACAGATCCA	AAACTGGATCTGTTAACAATTCAC	LibB_38158
SGCE #73	CACCGTTACCCAGACCGACCTGGA	AAACTCCAGGTCGGTCTGGGTAAC	LibA_43806
SGCZ #74	CACCGACCATAGGAGCTGATGCTG	AAACCAGCATCAGCTCCTATGGTC	LibB_43758
SRGAP2D #75	CACCTCAGCACCAAGCCAAGTACA	AAACTGTACTTGGCTTGGTGCTGA	LibA_46980
PPFIBP2 #76	CACCAACGCTTGGCACGTCTAGAA	AAACTTCTAGACGTGCCAAGCGTT	LibA_37888
ANKS1A #78	CACCCTCGAATTTGTTGTTGCGCA	AAACTGCGCAACAACAAATTCGAG	LibA_2150
PATL2 #79	CACCGCCATGGTACCTGGGTGTTG	AAACCAACACCCAGGTACCATGGC	LibB_35240
PPP2R4 #80	CACCTAGGCATACGCTGACTACAT	AAACATGTAGTCAGCGTATGCCTA	LibA_38166
